# Supplementary material
Source: MDPI journal article supplement (https://www.mdpi.com/2076-3417/12/4/2239)
Supplement: s1 [file s1]

**Table S1.** *p*-values for statistical difference of the relative gene marker expression between the six different tissue types.

|                 | PPRAG2 | LPL  | OC   | ALP  | COL1A1 | COL2A1 | AGN  | SOX9 |
|-----------------|--------|------|------|------|--------|--------|------|------|
| <i>p</i> -Value | ,968   | ,337 | ,093 | ,519 | ,989   | ,649   | ,677 | ,984 |
